# Supplementary material
Source: publisher site journal article supplement (https://www.dovepress.com/article/443454)
Supplement: Supplementary file 1 [file get_supplementary_file.php]

Supplementary Material

1. Supplementary table

Table S1: Non-suicidal self-injury symptoms, each criterion of DSM-5 Non-Suicidal Self-Injury Disorder, variable type and corresponding mnemonic codes

| Abbreviation | Criteria | Symptom/survey question | Variable type |
| --- | --- | --- | --- |
| NSSI1 | Criterion A | Frequency of non-suicidal self-injury within one year. | 5-point Likert scale ranging from 1 (Never before) to 5 (Once a day) |
|  | Criterion B | I injure myself … |  |
| NSSI2 | To obtain relief from a negative feeling or cognitive state. | 5-point Likert scale ranging from 1 (not at all) to 5 (very much so) |
| NSSI3 | To resolve interpersonal difficulty. |
| NSSI4 | To induce a positive feeling state. |
|  | Criterion C | In the period immediately prior to self-injuring, I experience … |  |
| NSSI5 | Negative feelings or thoughts (such as sadness, anxiety, tension, anger and so on). | 5-point Likert scale ranging from 1 (not at all) to 5 (very much so) |
| NSSI6 | Interpersonal conflicts. |
| NSSI7 | Preoccupation with the act that I can’t control. |
| NSSI8 | Frequent thinking about self-injury. |
| NULL | Criterion D | From the list below, which behavior(s) have you ever engaged in? | A list of behaviors, such as cutting, scratching, obstructing, hitting burning and so on. |
| I injure myself for another reason. | Open question, Not included in data analysis |
|  | Criterion E | Deliberately injuring myself… |  |
| NSSI9 | Causes clinically significant stress and pain. | 5-point Likert scale ranging from 1 (not at all) to 5 (very much so) |
| NSSI10 | Negatively influences my relationships with others. |
| NSSI11 | Negatively influences my performance (school/work/…) |
| NSSI12 | Negatively influences other important areas. If yes, describe which ones. |
| NULL | Criterion F | Do you only injury yourself when you have used drugs or alcohol? | Not included in data analysis |
| From the list below, which behavior(s) have you ever engaged in? |

Table S2: Edge connection strength between each symptom in the comorbidity network

|  | NSSI1 | NSSI2 | NSSI3 | NSSI4 | NSSI5 | NSSI6 | NSSI7 | NSSI8 | NSSI9 | NSSI10 | NSSI11 | NSSI12 | D1 | D2 | D3 | D4 | D5 | D6 | D7 | D8 | D9 |
| --- | --- | --- | --- | --- | --- | --- | --- | --- | --- | --- | --- | --- | --- | --- | --- | --- | --- | --- | --- | --- | --- |
| NSSI1 | 0.0000 | 0.1161 | 0.1059 | 0.015 | -0.125 | 0.000 | 0.060 | 0.184 | -0.0035 | 0.0000 | 0.0165 | 0.000 | 0.0000 | 0.0000 | 0.000 | 0.000 | 0.0000 | 0.0000 | 0.093 | 0.0000 | 0.060 |
| NSSI2 | 0.1161 | 0.0000 | 0.0347 | 0.299 | 0.278 | 0.000 | 0.000 | 0.085 | -0.0692 | 0.0000 | 0.0000 | 0.000 | 0.0000 | 0.0000 | 0.048 | 0.000 | 0.0000 | 0.0081 | 0.000 | 0.0000 | 0.000 |
| NSSI3 | 0.1059 | 0.0347 | 0.0000 | 0.227 | -0.048 | 0.392 | 0.000 | 0.000 | 0.0000 | 0.0142 | 0.0384 | 0.000 | 0.0000 | 0.0000 | 0.000 | 0.000 | 0.0000 | 0.0084 | 0.000 | 0.0000 | 0.026 |
| NSSI4 | 0.0148 | 0.2993 | 0.2272 | 0.000 | 0.000 | -0.071 | 0.108 | 0.000 | 0.0000 | 0.0000 | 0.0425 | 0.000 | 0.0000 | -0.0328 | 0.000 | 0.000 | 0.0000 | 0.0000 | -0.025 | 0.0000 | 0.000 |
| NSSI5 | -0.1249 | 0.2778 | -0.0476 | 0.000 | 0.000 | 0.221 | 0.246 | 0.057 | 0.0907 | 0.1057 | 0.0319 | 0.011 | 0.0000 | 0.0757 | 0.000 | 0.035 | 0.0000 | 0.0000 | 0.000 | 0.0000 | 0.000 |
| NSSI6 | 0.0000 | 0.0000 | 0.3922 | -0.071 | 0.221 | 0.000 | 0.137 | 0.027 | 0.0223 | 0.0589 | 0.0000 | 0.048 | 0.0000 | 0.0000 | 0.000 | 0.000 | 0.0000 | 0.0193 | 0.000 | 0.0000 | 0.000 |
| NSSI7 | 0.0604 | 0.0000 | 0.0000 | 0.108 | 0.246 | 0.137 | 0.000 | 0.342 | 0.0000 | 0.0000 | 0.0152 | 0.031 | 0.0000 | 0.0000 | 0.000 | 0.000 | 0.0000 | 0.0000 | 0.000 | 0.0000 | 0.000 |
| NSSI8 | 0.1839 | 0.0848 | 0.0000 | 0.000 | 0.057 | 0.027 | 0.342 | 0.000 | 0.0000 | 0.0000 | 0.0000 | 0.000 | -0.0378 | 0.0000 | 0.000 | 0.000 | 0.0000 | 0.1328 | 0.000 | 0.0000 | 0.215 |
| NSSI9 | -0.0035 | -0.0692 | 0.0000 | 0.000 | 0.091 | 0.022 | 0.000 | 0.000 | 0.0000 | 0.1931 | 0.0000 | 0.274 | 0.0000 | 0.0000 | 0.000 | 0.000 | 0.0000 | 0.0000 | -0.023 | 0.0000 | -0.0473 |
| NSSI10 | 0.0000 | 0.0000 | 0.0142 | 0.000 | 0.106 | 0.059 | 0.000 | 0.000 | 0.1931 | 0.0000 | 0.3341 | 0.191 | 0.0000 | 0.0000 | 0.000 | 0.000 | 0.0096 | 0.0000 | 0.000 | 0.0142 | 0.000 |
| NSSI11 | 0.0165 | 0.0000 | 0.0384 | 0.042 | 0.032 | 0.000 | 0.015 | 0.000 | 0.0000 | 0.3341 | 0.0000 | 0.467 | 0.0000 | 0.0061 | 0.000 | 0.000 | 0.0000 | -0.0148 | 0.000 | 0.0503 | 0.000 |
| NSSI12 | 0.0000 | 0.0000 | 0.0000 | 0.000 | 0.011 | 0.048 | 0.031 | 0.000 | 0.2737 | 0.1915 | 0.4671 | 0.000 | 0.0000 | 0.0000 | 0.000 | 0.000 | 0.0167 | 0.0000 | 0.000 | 0.0000 | 0.000 |
| D1 | 0.0000 | 0.0000 | 0.0000 | 0.000 | 0.000 | 0.000 | 0.000 | -0.038 | 0.0000 | 0.0000 | 0.0000 | 0.000 | 0.0000 | 0.4647 | 0.000 | 0.401 | 0.0346 | 0.1263 | 0.083 | 0.0065 | 0.000 |
| D2 | 0.0000 | 0.0000 | 0.0000 | -0.033 | 0.076 | 0.000 | 0.000 | 0.000 | 0.0000 | 0.0000 | 0.0061 | 0.000 | 0.4647 | 0.0000 | 0.000 | 0.075 | 0.1293 | 0.1185 | 0.000 | 0.0000 | 0.211 |
| D3 | 0.0000 | 0.0484 | 0.0000 | 0.000 | 0.000 | 0.000 | 0.000 | 0.000 | 0.0000 | 0.0000 | 0.0000 | 0.000 | 0.0000 | 0.0000 | 0.000 | 0.193 | 0.1352 | 0.1463 | 0.028 | 0.0432 | 0.000 |
| D4 | 0.0000 | 0.0000 | 0.0000 | 0.000 | 0.035 | 0.000 | 0.000 | 0.000 | 0.0000 | 0.0000 | 0.0000 | 0.000 | 0.4012 | 0.0751 | 0.193 | 0.000 | 0.2374 | 0.0000 | 0.000 | 0.1279 | 0.000 |
| D5 | 0.0000 | 0.0000 | 0.0000 | 0.000 | 0.000 | 0.000 | 0.000 | 0.000 | 0.0000 | 0.0096 | 0.0000 | 0.017 | 0.0346 | 0.1293 | 0.135 | 0.237 | 0.0000 | 0.0534 | 0.076 | 0.1472 | 0.000 |
| D6 | 0.0000 | 0.0081 | 0.0084 | 0.000 | 0.000 | 0.019 | 0.000 | 0.133 | 0.0000 | 0.0000 | -0.0148 | 0.000 | 0.1263 | 0.1185 | 0.146 | 0.000 | 0.0534 | 0.0000 | 0.129 | 0.0000 | 0.359 |
| D7 | 0.0929 | 0.0000 | 0.0000 | -0.025 | 0.000 | 0.000 | 0.000 | 0.000 | -0.0235 | 0.0000 | 0.0000 | 0.000 | 0.0830 | 0.0000 | 0.028 | 0.000 | 0.0756 | 0.1290 | 0.000 | 0.3738 | 0.014 |
| D8 | 0.0000 | 0.0000 | 0.0000 | 0.000 | 0.000 | 0.000 | 0.000 | 0.000 | 0.0000 | 0.0142 | 0.0503 | 0.000 | 0.0065 | 0.0000 | 0.043 | 0.128 | 0.1472 | 0.0000 | 0.374 | 0.0000 | 0.158 |
| D9 | 0.0596 | 0.0000 | 0.0263 | 0.000 | 0.000 | 0.000 | 0.000 | 0.215 | -0.0473 | 0.0000 | 0.0000 | 0.000 | 0.0000 | 0.2110 | 0.000 | 0.000 | 0.0000 | 0.3586 | 0.014 | 0.1582 | 0.000 |

1. Supplementary Figure


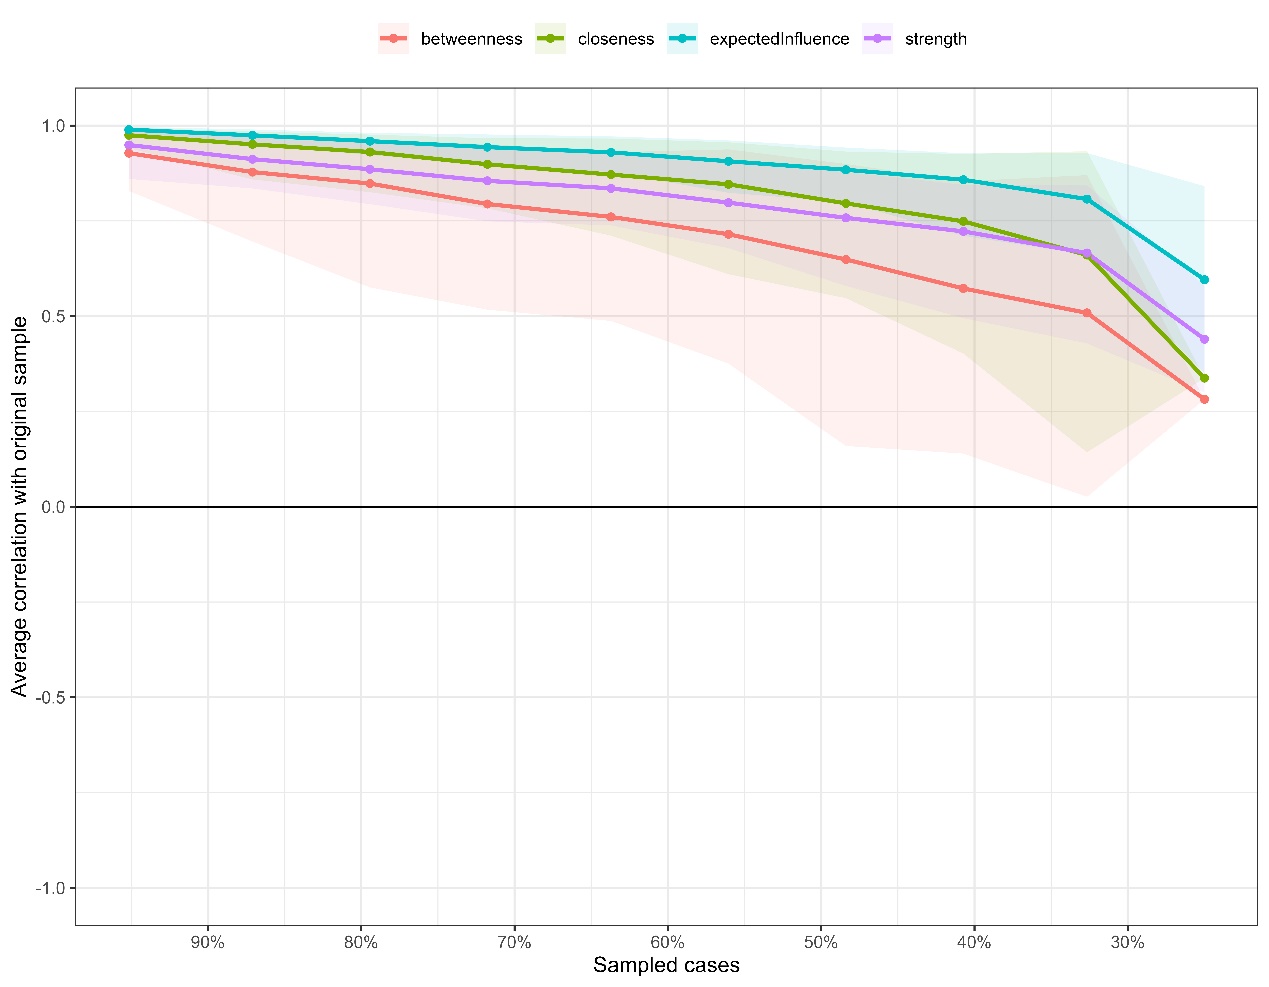


Figure S1: Average correlations between centrality indices of networks sampled with persons dropped and the original sample. Lines indicate the means and areas indicate the range from the 2.5th quantile to the 97.5th quantile


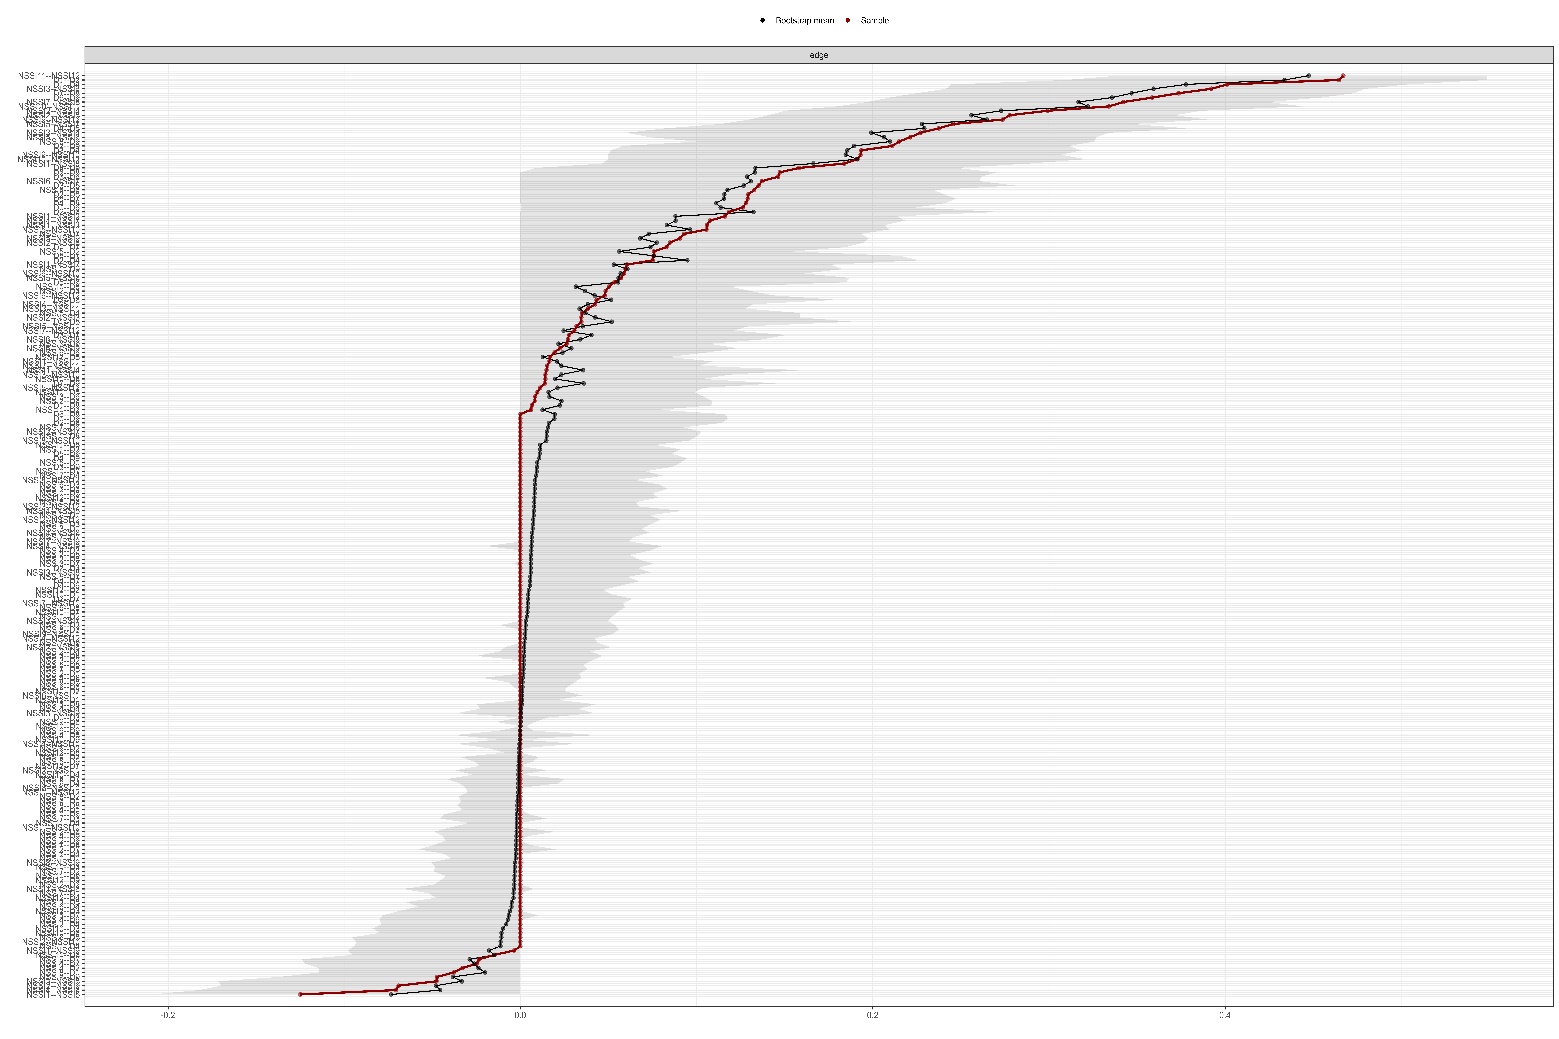


Figure S2: Bootstrapped confidence intervals of estimated edge-weights. The red line indicates the sample values and the gray area the bootstrapped CIs.


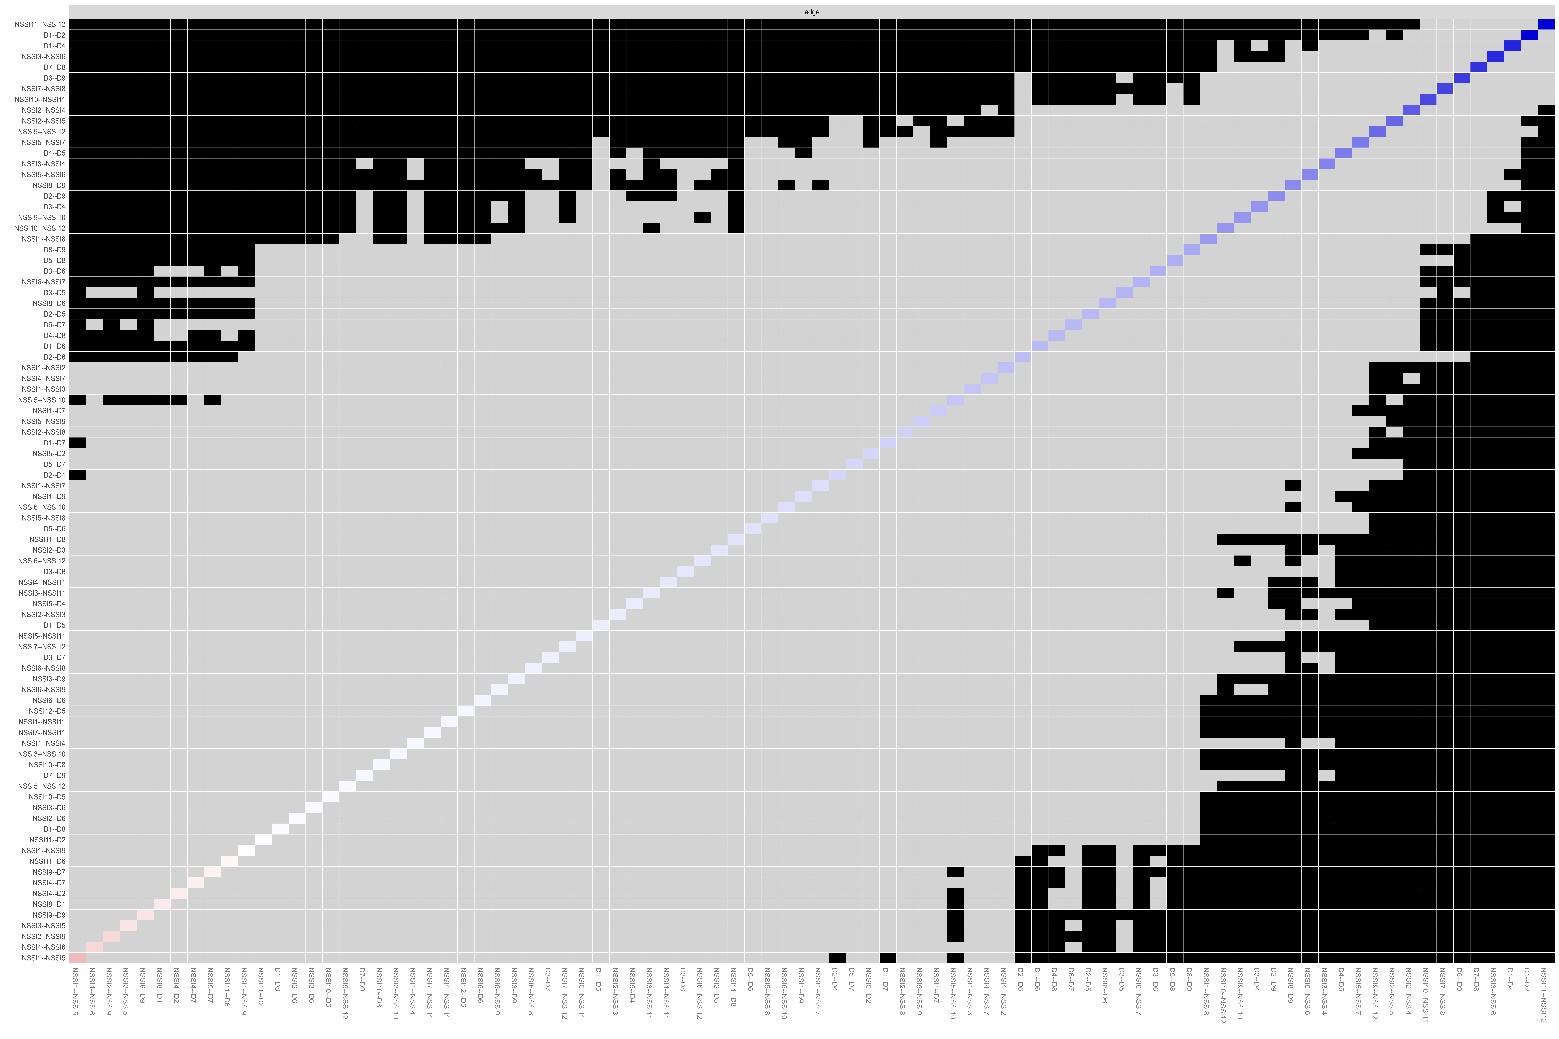


Figure S3: Bootstrapped difference tests (*α* = 0.05) between edge-weights that were non-zero in the estimated network. Black boxes indicate a significant difference between two edge-weights and grey boxes indicate no significant difference. Colored boxes in the plot correspond to the color of the edge in Figure 2.


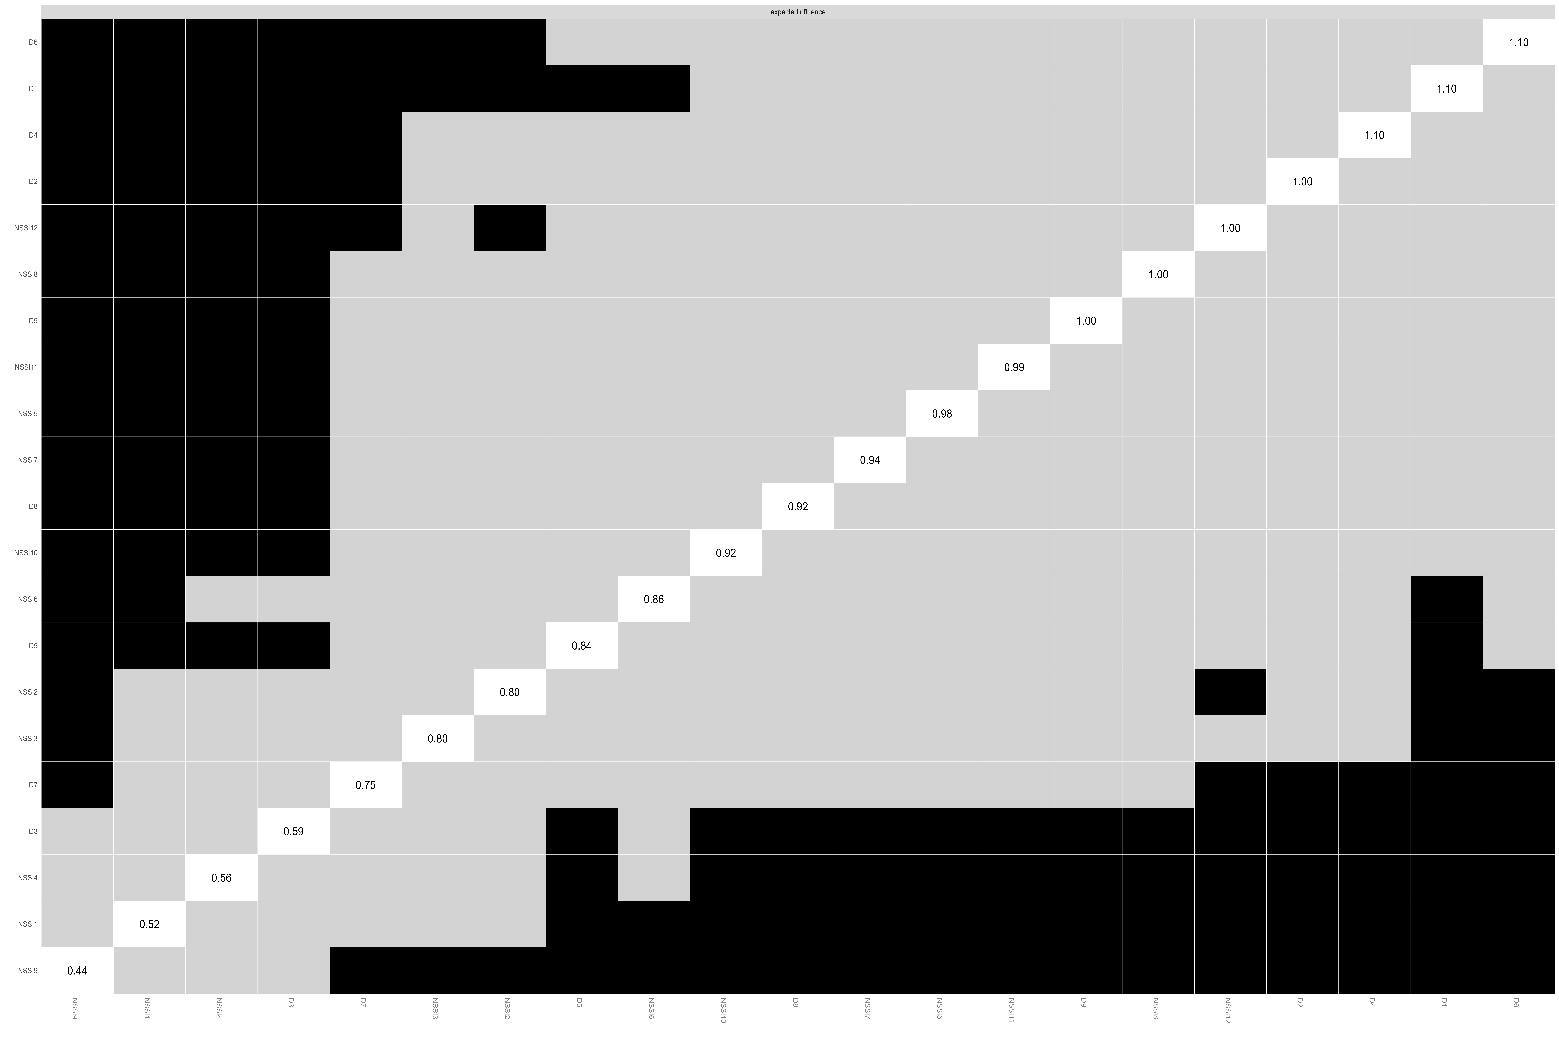


Figure S4: Bootstrapped difference tests (*α* = 0.05) between node expected influence of the estimated network. Black boxes indicate a significant difference between two node and grey boxes indicate no significant difference. white boxes in the centrality plot show the value of node expected influence.
